# Supplementary material for: Identification of germ cell-specific genes in mammalian meiotic prophase
Source: Springer Nature journal article supplement (doi:10.1186/1471-2105-14-72), 2013-02-27
Supplement: 12859_2012_5731_MOESM1_ESM.pdf [file 12859_2012_5731_MOESM1_ESM.pdf]

**Additional file 1**

## **Identification of germ cell-specific genes in mammalian meiotic prophase**

**Yunfei Li<sup>1</sup>, Debjit Ray<sup>1,2</sup>, Ping Ye<sup>1,3§</sup>**

<sup>1</sup>School of Molecular Biosciences, <sup>2</sup>Biological Systems Engineering, <sup>3</sup>Center for Reproductive Biology, Washington State University, PO Box 647520, Pullman, WA 99164, USA

<sup>§</sup>Corresponding author

Email addresses:

YL: [yunfei\\_li@wsu.edu](mailto:yunfei_li@wsu.edu)

DR: [debjit\\_ray@wsu.edu](mailto:debjit_ray@wsu.edu)

PY: [pye@wsu.edu](mailto:pye@wsu.edu)

**Table S1 - Top-100 predicted spermatocyte genes**

| Rank | Mouse gene symbols   |
|------|----------------------|
| 1    | <i>Zfp541</i>        |
| 2    | <i>Stk33</i>         |
| 3    | <i>1700006A11Rik</i> |
| 4    | <i>Syngn4</i>        |
| 5    | <i>5330409N07Rik</i> |
| 6    | <i>Prps11l</i>       |
| 7    | <i>Gpr160</i>        |
| 8    | <i>1700123I01Rik</i> |
| 9    | <i>LOC100047259</i>  |
| 10   | <i>Prss50</i>        |
| 11   | <i>Mdh1b</i>         |
| 12   | <i>Cmtm2a</i>        |
| 13   | <i>Lypd4</i>         |
| 14   | <i>Ttc30a2</i>       |
| 15   | <i>Spesp1</i>        |
| 16   | <i>Morc2b</i>        |
| 17   | <i>1700066D14Rik</i> |
| 18   | <i>Zmynd10</i>       |
| 19   | <i>BC051142</i>      |
| 20   | <i>Pacrg</i>         |
| 21   | <i>Dynlrb2</i>       |
| 22   | <i>1700006J14Rik</i> |
| 23   | <i>9330102E08Rik</i> |
| 24   | <i>1700003M02Rik</i> |
| 25   | <i>1700013G23Rik</i> |
| 26   | <i>Gm3925</i>        |
| 27   | <i>Dmrtc2</i>        |
| 28   | <i>Acs16</i>         |
| 29   | <i>1700074P13Rik</i> |
| 30   | <i>2900006K08Rik</i> |
| 31   | <i>Adam5</i>         |
| 32   | <i>Glipr112</i>      |
| 33   | <i>4930519N06Rik</i> |
| 34   | <i>Tekt1</i>         |
| 35   | <i>Gtf2a1l</i>       |
| 36   | <i>1700097M23Rik</i> |
| 37   | <i>Ccdc158</i>       |
| 38   | <i>Gm10345</i>       |
| 39   | <i>1700029P11Rik</i> |
| 40   | <i>Spink2</i>        |
| 41   | <i>Msh4</i>          |
| 42   | <i>1700010I14Rik</i> |
| 43   | <i>4930549O18Rik</i> |

44 *Eid3*  
45 *Slc41a2*  
46 *Boll*  
47 *Tcam1*  
48 *4930556A12Rik*  
49 *Inca1*  
50 *1700012B09Rik*  
51 *4930405N21Rik*  
52 *Cetn4*  
53 *Gsto2*  
54 *Lrrc34*  
55 *AW552889*  
56 *4930444F02Rik*  
57 *Ptpn20*  
58 *Mlc1*  
59 *1700027A23Rik*  
60 *Hdgfl1*  
61 *Ccnb3*  
62 *Pet2*  
63 *4930463O16Rik*  
64 *Nme5*  
65 *Cep72*  
66 *4930511M11Rik*  
67 *Cetn1*  
68 *Drd4*  
69 *Bhmt*  
70 *1700028J19Rik*  
71 *Efhc1*  
72 *1700040L02Rik*  
73 *Tll8*  
74 *Ccdc18*  
75 *Sfrs14*  
76 *4922502D21Rik*  
77 *1700016M24Rik*  
78 *Ncrna00086*  
79 *Actn3*  
80 *Lrrc50*  
81 *Lrp8*  
82 *Anxa9*  
83 *Tmem87a*  
84 *Phyhipl*  
85 *Ttc26*  
86 *Ero11b*  
87 *Fbxo15*  
88 *Pou6f1*  
89 *Arap2*

90 *Corin*  
91 *Gm884*  
92 *Hsf2bp*  
93 *Rimklb*  
94 *Cep290*  
95 *Spo11*  
96 *Zfp385b*  
97 *1700007L15Rik*  
98 *Pfn4*  
99 *Asrgl1*  
100 *4633401B06Rik*

---

**Table S2 - Top-100 predicted oocyte genes**

| Rank | Mouse gene symbols  |
|------|---------------------|
| 1    | <i>Pde6d</i>        |
| 2    | <i>Rab18</i>        |
| 3    | <i>Ccdc79</i>       |
| 4    | <i>Phf16</i>        |
| 5    | <i>Btbd10</i>       |
| 6    | <i>LOC100047893</i> |
| 7    | <i>Tm9sf2</i>       |
| 8    | <i>Nupl1</i>        |
| 9    | <i>Stx12</i>        |
| 10   | <i>Mpp5</i>         |
| 11   | <i>Igf1</i>         |
| 12   | <i>Rab11a</i>       |
| 13   | <i>Uimc1</i>        |
| 14   | <i>Pank3</i>        |
| 15   | <i>AW549877</i>     |
| 16   | <i>Smc3</i>         |
| 17   | <i>Gpat2</i>        |
| 18   | <i>Pdk3</i>         |
| 19   | <i>Irs1</i>         |
| 20   | <i>D6Mm5e</i>       |
| 21   | <i>Ciao1</i>        |
| 22   | <i>Csrp1</i>        |
| 23   | <i>Usp9x</i>        |
| 24   | <i>Rraga</i>        |
| 25   | <i>Osbp12</i>       |
| 26   | <i>Sun1</i>         |
| 27   | <i>Ythdc1</i>       |
| 28   | <i>BC005537</i>     |
| 29   | <i>Cstf2</i>        |
| 30   | <i>Cmpk1</i>        |
| 31   | <i>Eif2b3</i>       |
| 32   | <i>Bclaf1</i>       |
| 33   | <i>Thumpd1</i>      |
| 34   | <i>Asf1b</i>        |
| 35   | <i>Rchy1</i>        |
| 36   | <i>Dnm1l</i>        |
| 37   | <i>Tpr</i>          |
| 38   | <i>Jagn1</i>        |
| 39   | <i>Pkd2</i>         |
| 40   | <i>LOC100043982</i> |
| 41   | <i>Krcc1</i>        |
| 42   | <i>Vamp3</i>        |
| 43   | <i>M6pr</i>         |

44 *Copb1*  
45 *Sec22b*  
46 *Ptbp2*  
47 *Sec61a1*  
48 *Rab28*  
49 *Spop*  
50 *Ccnblip1*  
51 *Man1a*  
52 *Nit2*  
53 *Rasa1*  
54 *Zfp187*  
55 *Ctsb*  
56 *Ngly1*  
57 *Mobkl1b*  
58 *Fgfr2*  
59 *Atxn10*  
60 *Nrbp1*  
61 *Bnip3*  
62 *Sec61a2*  
63 *Fam18b*  
64 *Fbxo21*  
65 *Vcl*  
66 *6330409N04Rik*  
67 *Papolg*  
68 *Matr3*  
69 *Esf1*  
70 *Hsd17b12*  
71 *Cpne1*  
72 *Fam126a*  
73 *Tmed2*  
74 *Igfbp5*  
75 *Zfp445*  
76 *Nop58*  
77 *Uba6*  
78 *1200016B10Rik*  
79 *Eif4e*  
80 *Tax1bp3*  
81 *Capn7*  
82 *Gm1564*  
83 *Rspo1*  
84 *Tgfbr1*  
85 *Notch2*  
86 *Alb*  
87 *Uba3*  
88 *Hectd1*  
89 *6330503K22Rik*

90 *Taf6*  
91 *Rhox13*  
92 *Fam120a*  
93 *Med4*  
94 *Rad17*  
95 *Tex14*  
96 *Usp34*  
97 *Bnc1*  
98 *Parg*  
99 *Clns1a*  
100 *Psm1*

---

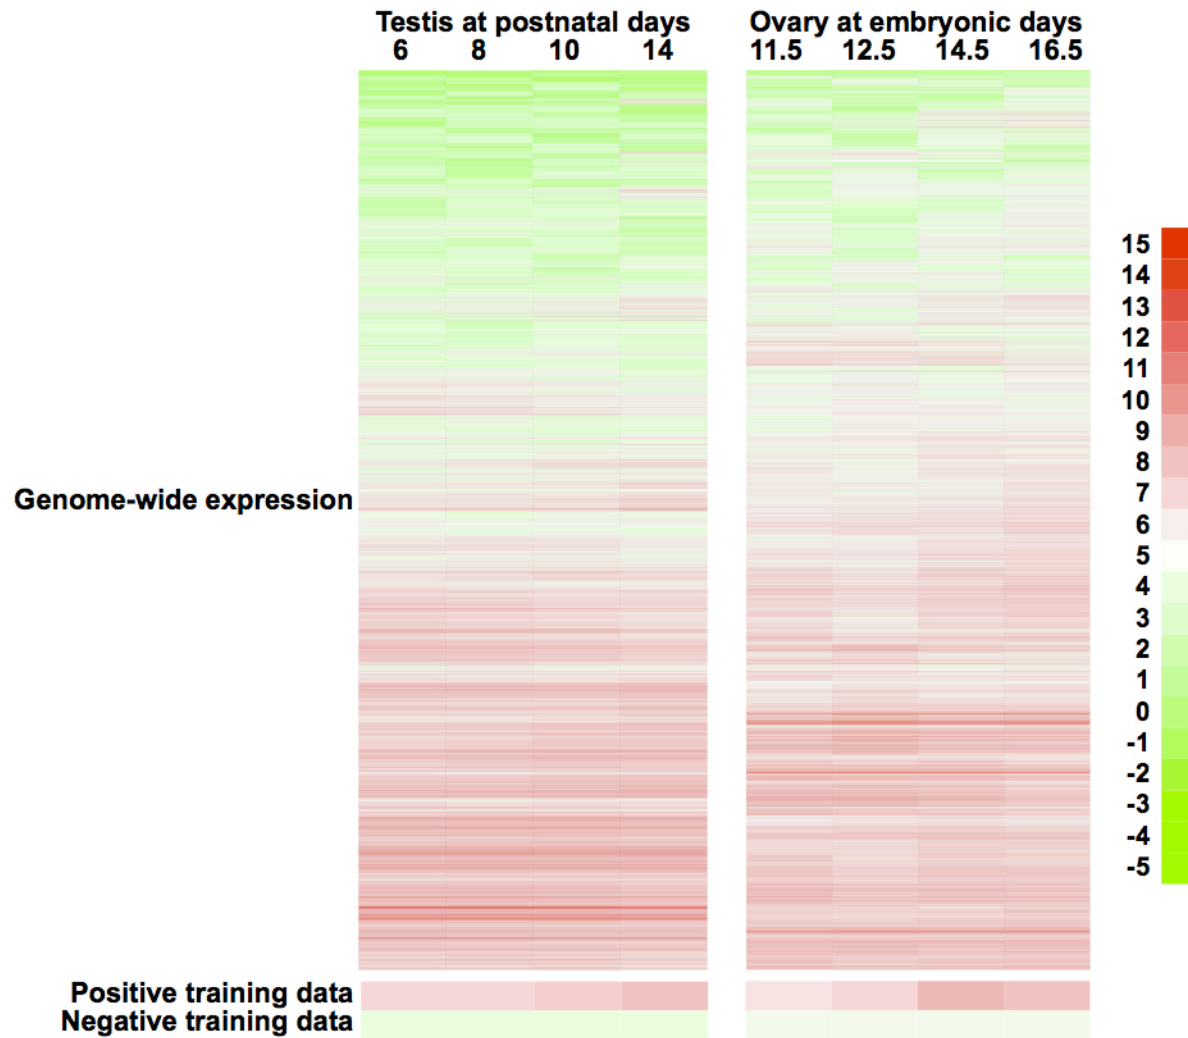

**Figure S1 - Global gene expression and training data expression in meiotic prophase**

Gene expression levels were log<sub>2</sub> transformed. The global expression data were analyzed by average linkage hierarchical clustering using uncentered correlation as distance metrics. The average expression profiles of training data are shown at the bottom of the figure.
