# Supplementary material for: Identification of germ cell-specific genes in mammalian meiotic prophase
Source: Springer Nature journal article supplement (doi:10.1186/1471-2105-14-72), 2013-02-27

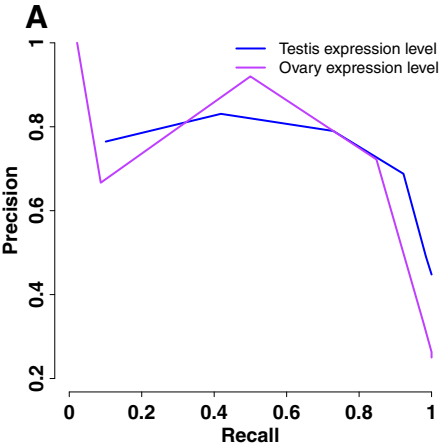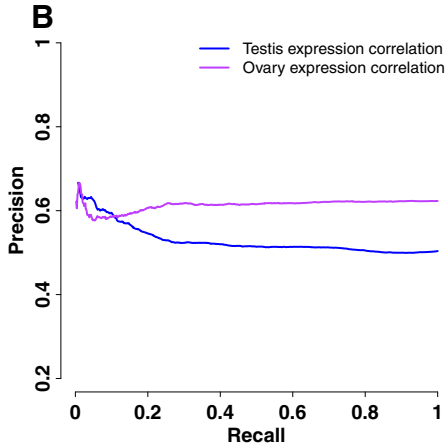

Supplement: 12859_2012_5731_MOESM4_ESM.pdf [file 12859_2012_5731_MOESM4_ESM.pdf]
